# Supplementary material for: Al-doped Fe2O3 as a support for molybdenum oxide methanol oxidation catalysts
Source: Royal Society of Chemistry journal article supplement (doi:10.1039/d0cp01192d), 2020-01-01
Supplement: d0cp01192d1.pdf [file d0cp01192d1.pdf]

## Supplementary Information

### Al-doped Fe<sub>2</sub>O<sub>3</sub> as a support for molybdenum oxide methanol oxidation catalysts

Michael Bowker<sup>1,2\*</sup>, Pip Hellier<sup>1,2</sup> and Peter P. Wells<sup>3,4</sup>, Donato Decarolis<sup>2</sup>, Diego Gianolio<sup>3</sup>, Khaled M. H. Mohammed<sup>4,5</sup>, Alex Stenner<sup>4</sup>, Thomas Huthwelker<sup>6</sup>

<sup>1</sup>Cardiff Catalysis Institute, School of Chemistry, Cardiff University, Cardiff CF10 3AT, UK

<sup>2</sup>UK Catalysis Hub, Research Complex at Harwell, Rutherford Appleton Lab, Harwell, Oxfordshire OX11 0FA, UK

<sup>3</sup> Diamond Light Source Ltd, Harwell Science and Innovation Campus, Didcot OX11 0DE, UK

<sup>4</sup> School of Chemistry, University of Southampton, Southampton SO17 1BJ

<sup>5</sup> Department of Chemistry, Faculty of Science, Sohag University, Sohag, P.O.Box 82524, Egypt.

<sup>6</sup>Paul Scherrer Institut 5232 Villigen-PSI Switzerland

**1. Catalyst preparation.** In addition to the preparation description in the main text, the following shows the relationship between wt% loading of Al and the atomic fraction present in the sample

For example for the 5 wt% Al<sub>2</sub>O<sub>3</sub> sample, there are 0.05g./102 g.mol = 5 x 10<sup>-4</sup> mol, whereas the Fe<sub>2</sub>O<sub>3</sub> is 0.95g/160 g. mol<sup>-1</sup> = 5.9 x 10<sup>-3</sup> mol. And so the cation % Al = 5 x 10<sup>-4</sup>/64x10<sup>-4</sup> = 7.8%. Similar calculations for the other samples yield the graph in figure S1

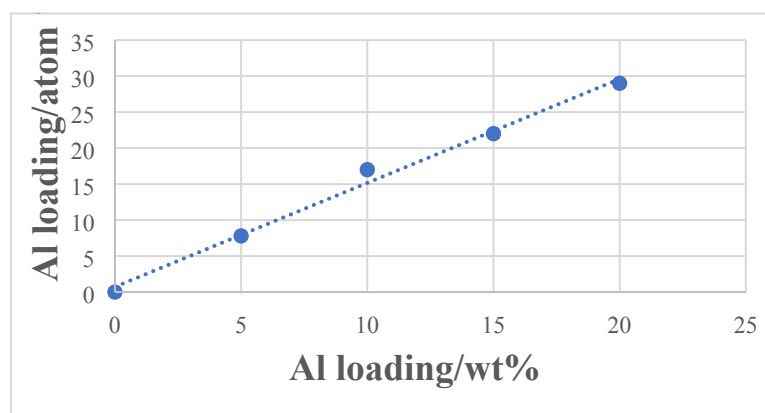

Figure S1. *Dependence of atomic fraction of Al upon wt% loading.*

**2. XRD.** Figure S2 shows the XRD patterns for the various Al doped samples and undoped haematite

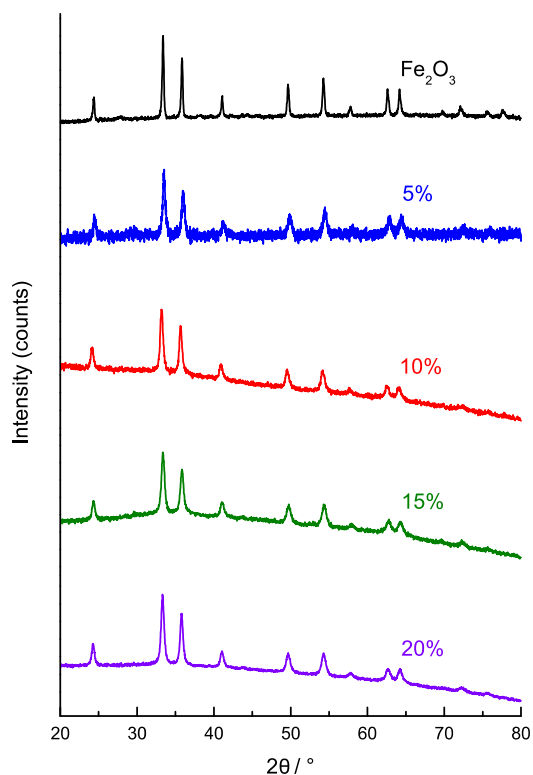

Figure S2. A comparison of XRD patterns for 0, 5, 10, 15, 20% HSA  $\text{Fe}_2\text{O}_3$  with an  $\text{Fe}_2\text{O}_3$  reference.

### 3. TEM

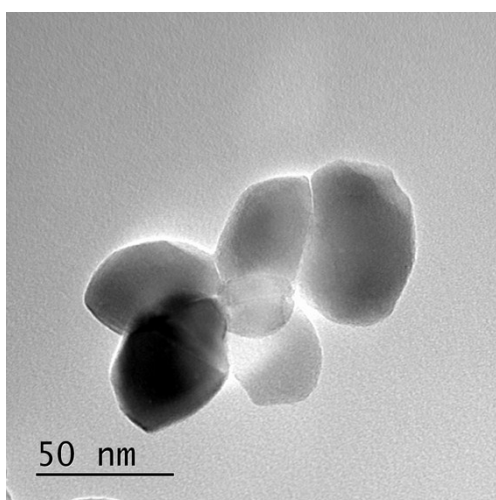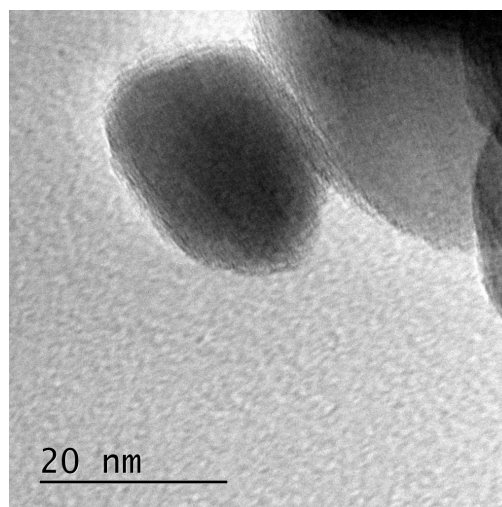

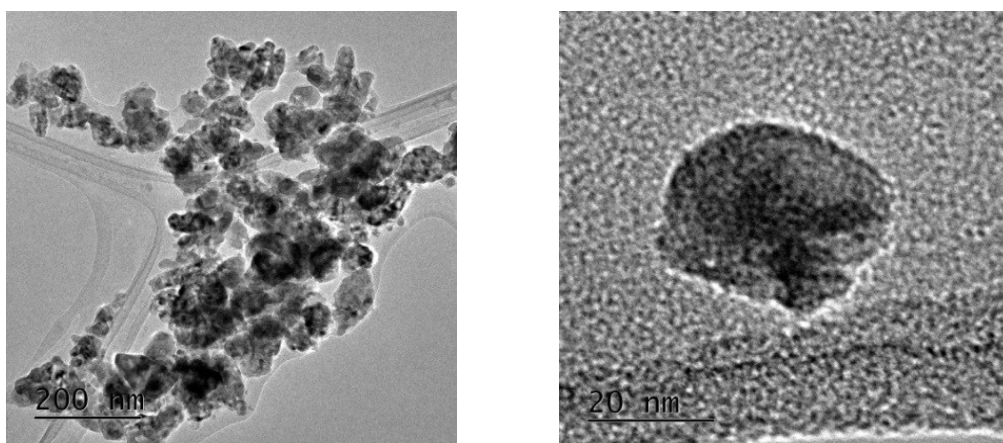

Figure S3. Some TEM images of the haematite samples. Top left panel: An example TEM image of 10% HSA  $\text{Fe}_2\text{O}_3$ : average particle diameter is approximately 45 nm. Top right panel: An example TEM image of 15% HSA  $\text{Fe}_2\text{O}_3$ : the diameter of the individual particle is 25 nm, while the average particle diameter including particles to the right of the image is approximately 35 nm. Images of 5% samples are in the lower figures.

#### 4. Raman spectra and deconvolution

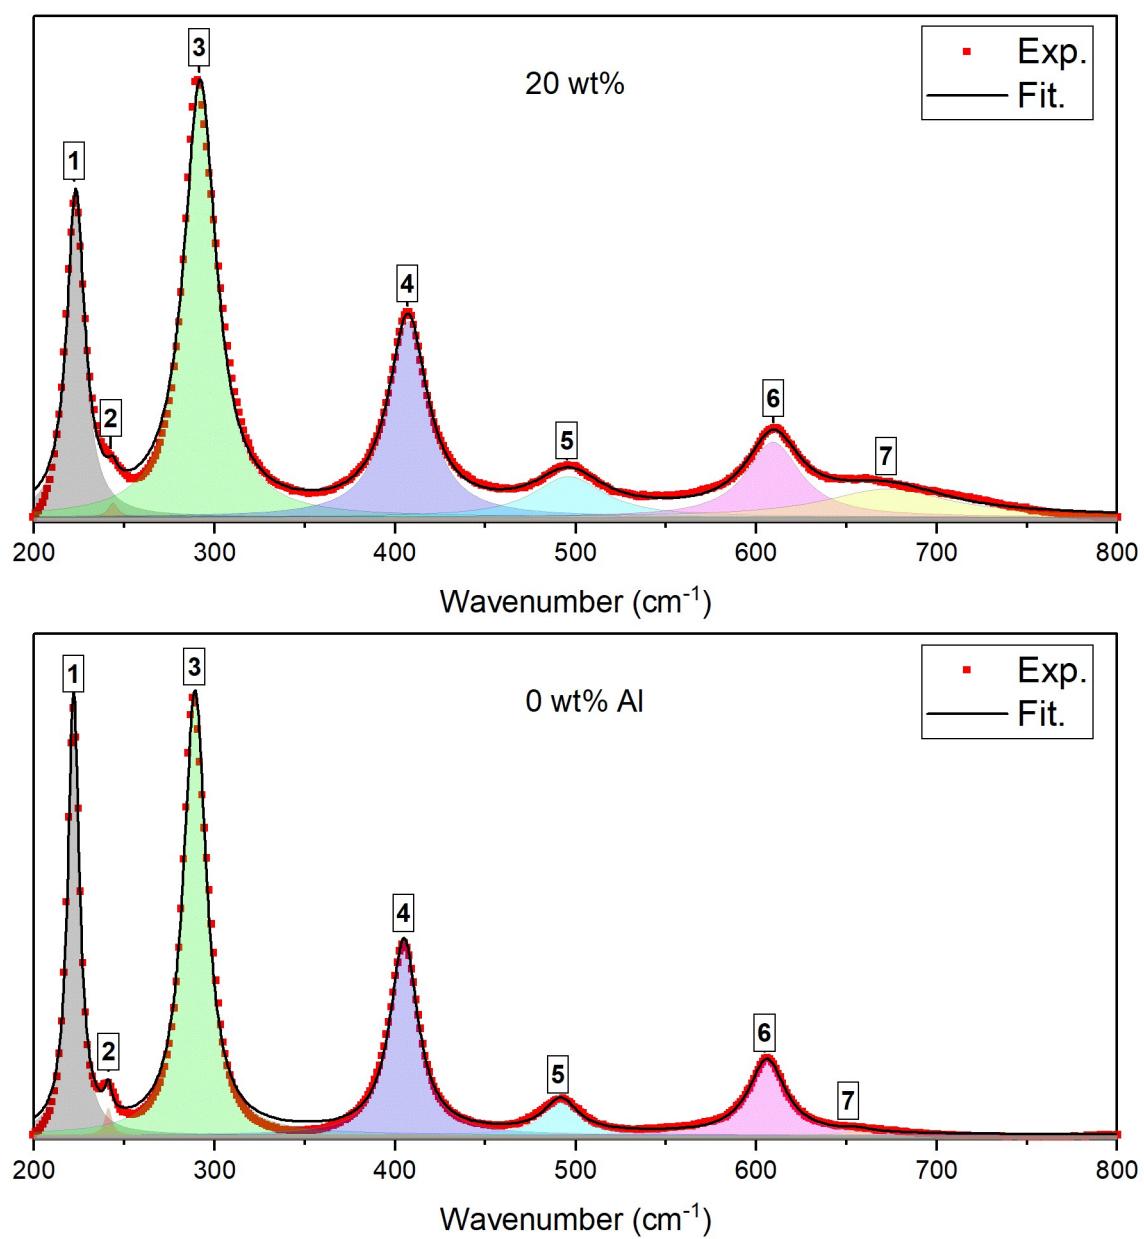

Figure S4. Examples of Raman spectra fitting obtained for 0 and 20 wt% Al-doped-haematite samples and their fits, particularly showing the band at  $\sim 670\text{ cm}^{-1}$ .

#### 4. TPD

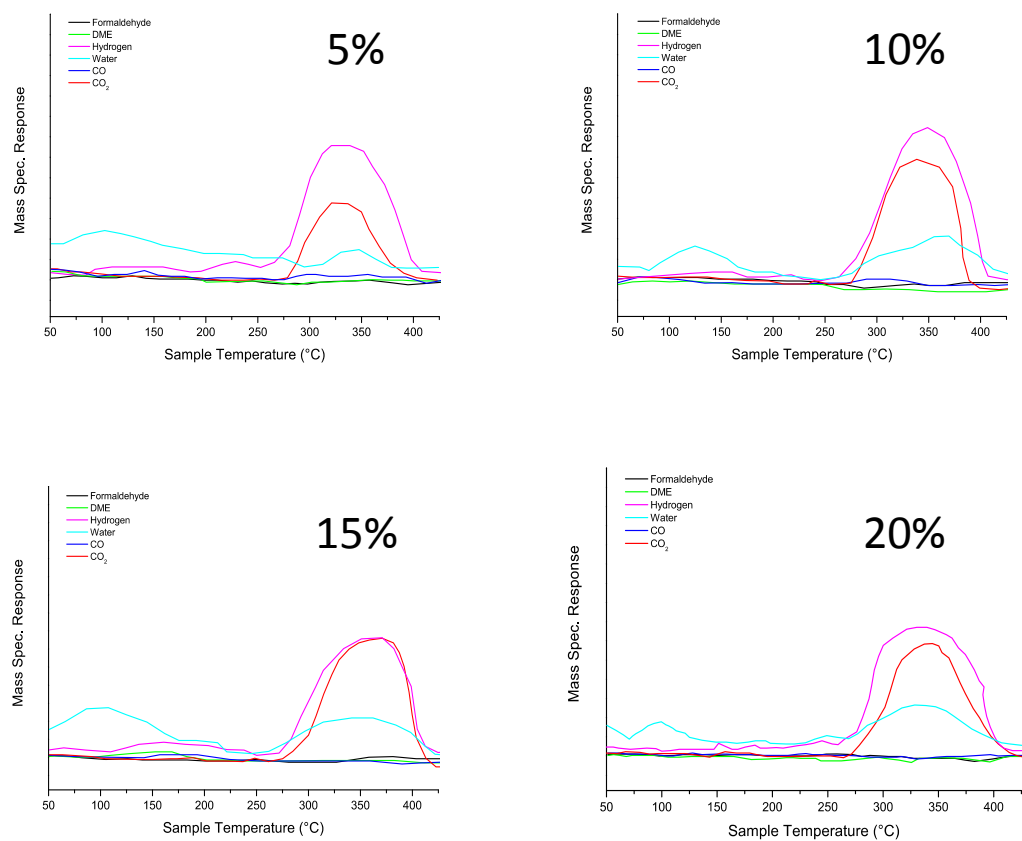

Fig S5. TPD from four loading of Al in  $\text{Fe}_2\text{O}_3$

Table S1. Estimated parameters (peak position and FWHM) of Raman spectra for Al-doped-haematite samples (Al wt% reported); the error evaluated as standard deviation is reported in parentheses.

| Al loadings | Bands    | 1           | 2          | 3           | 4          | 5          | 6          | 7          | R-square |
|-------------|----------|-------------|------------|-------------|------------|------------|------------|------------|----------|
| 0 wt%       | position | 221.9(0.04) | 241.2(0.4) | 289.2(0.05) | 404.9(0.1) | 491.9(0.8) | 606.0(0.4) | 655.6(7.2) | 0.9937   |
|             | FWHM     | 7.7(0.1)    | 4.7(1.3)   | 15.3(0.1)   | 18.6(0.3)  | 23.3(2.2)  | 24.7(1.1)  | 18.2(22.2) |          |
| 5 wt%       | position | 223.4(0.05) | 241.2(0.9) | 291.5(0.06) | 407.7(0.2) | 497.0(0.9) | 609.8(0.6) | 672.9(0.7) | 0.9917   |
|             | FWHM     | 9.9(0.2)    | 7.0(2.9)   | 18.4(0.2)   | 23.7(0.6)  | 37.9(2.8)  | 31.1(2.1)  | 73.7(20.2) |          |
| 10 wt%      | position | 225.2(0.06) | 243.6(0.9) | 293.2(0.06) | 410.9(0.2) | 499.7(0.9) | 613.4(0.5) | 669.6(5.7) | 0.9882   |
|             | FWHM     | 9.2(0.2)    | 6.4(2.9)   | 16.2(0.2)   | 19.0(0.5)  | 31.7(2.7)  | 26.1(1.9)  | 57.7(17.6) |          |
| 15 wt%      | position | 225.1(0.06) | 245.1(0.9) | 293.3(0.06) | 410.7(0.2) | 499.9(0.9) | 613.5(0.6) | 671.4(5.7) | 0.9902   |
|             | FWHM     | 10.6(0.2)   | 5.7(2.8)   | 18.1(0.2)   | 21.3(0.5)  | 31.2(2.6)  | 29.9(1.9)  | 46.8(18.2) |          |
| 20 wt%      | position | 223.1(0.07) | 243.8(1.1) | 292(0.06)   | 407.1(0.2) | 496.2(1.0) | 609.5(0.5) | 672.6(3.1) | 0.9927   |
|             | FWHM     | 11.8(0.2)   | 6.4(3.3)   | 21.7(0.2)   | 26.1(0.5)  | 47.9(3.3)  | 36.8(2.1)  | 85.7(8.6)  |          |

## 5. Reactor data.

Figure S6a

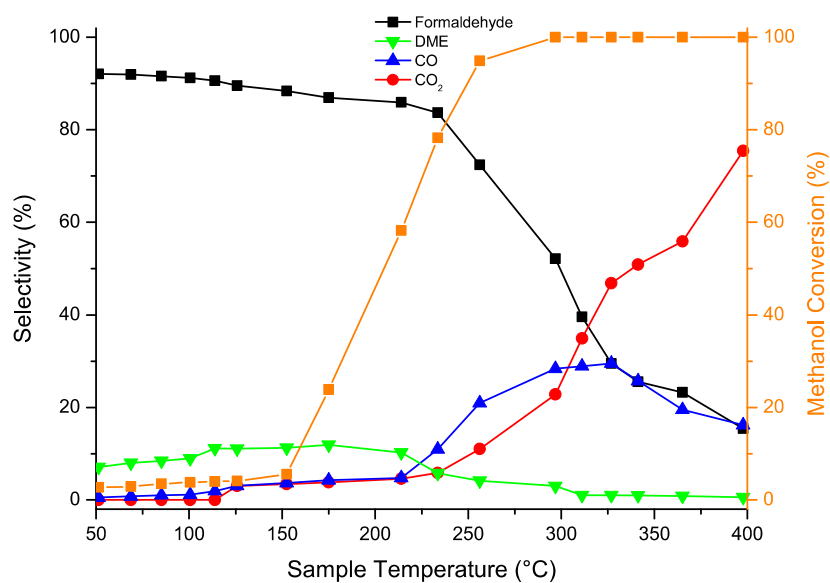

Figure S6b

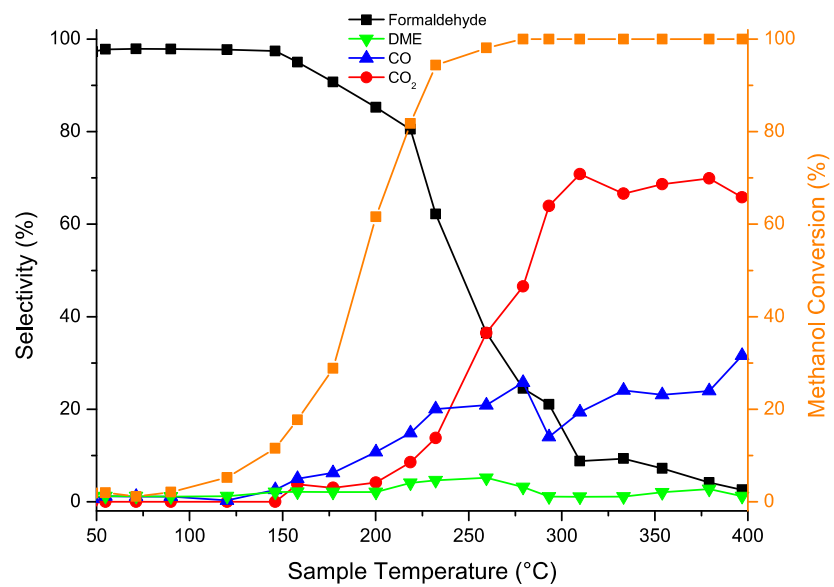

Figure S6c

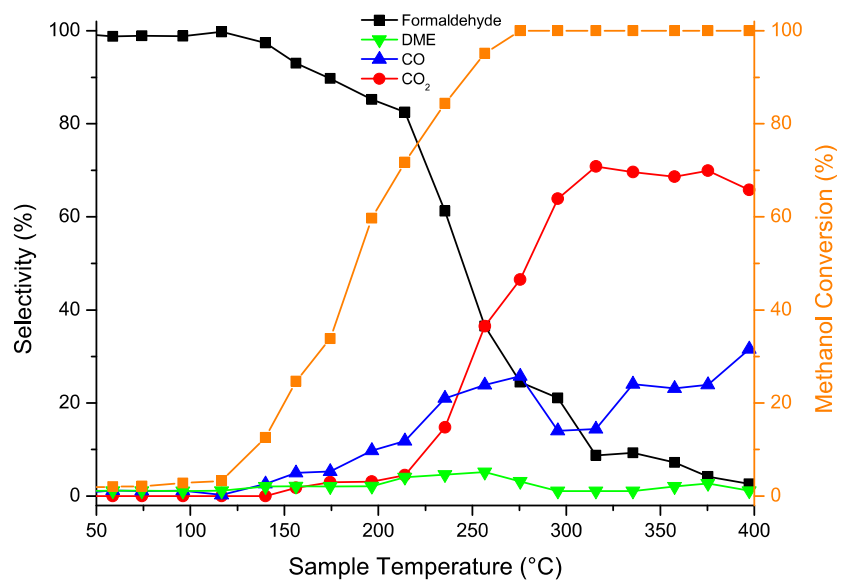

Figure S6d

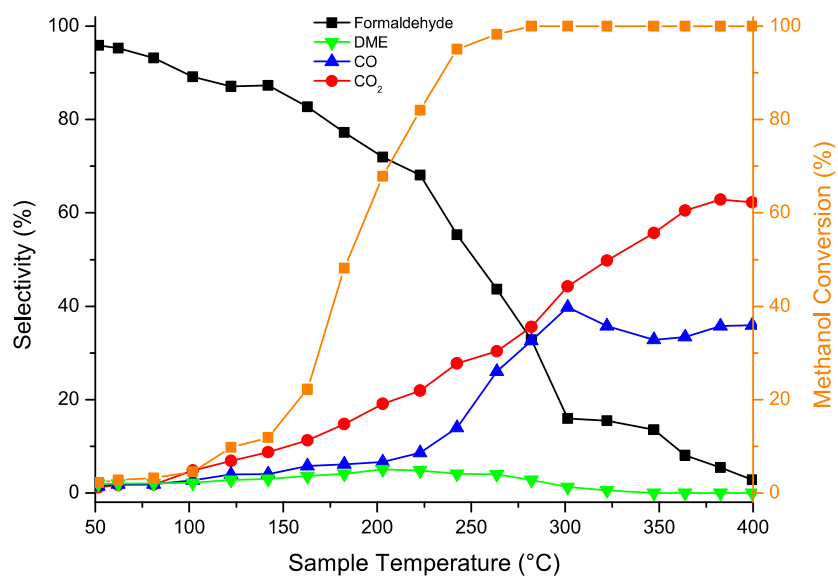

Figure S6e

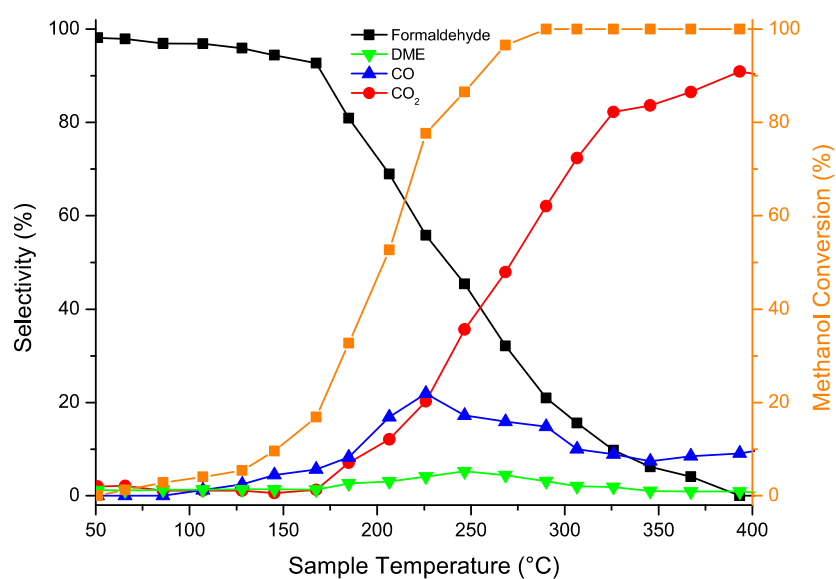

Figure S6. Pulsed flow reactor data from 3ML of Mo on a) Fe<sub>2</sub>O<sub>3</sub>, and on b) 5% HSA, c) 10% HSA, d) 15% HSA, and e) 20% HSA.



## 6. XAS data. Data for the 1 ML sample are shown below

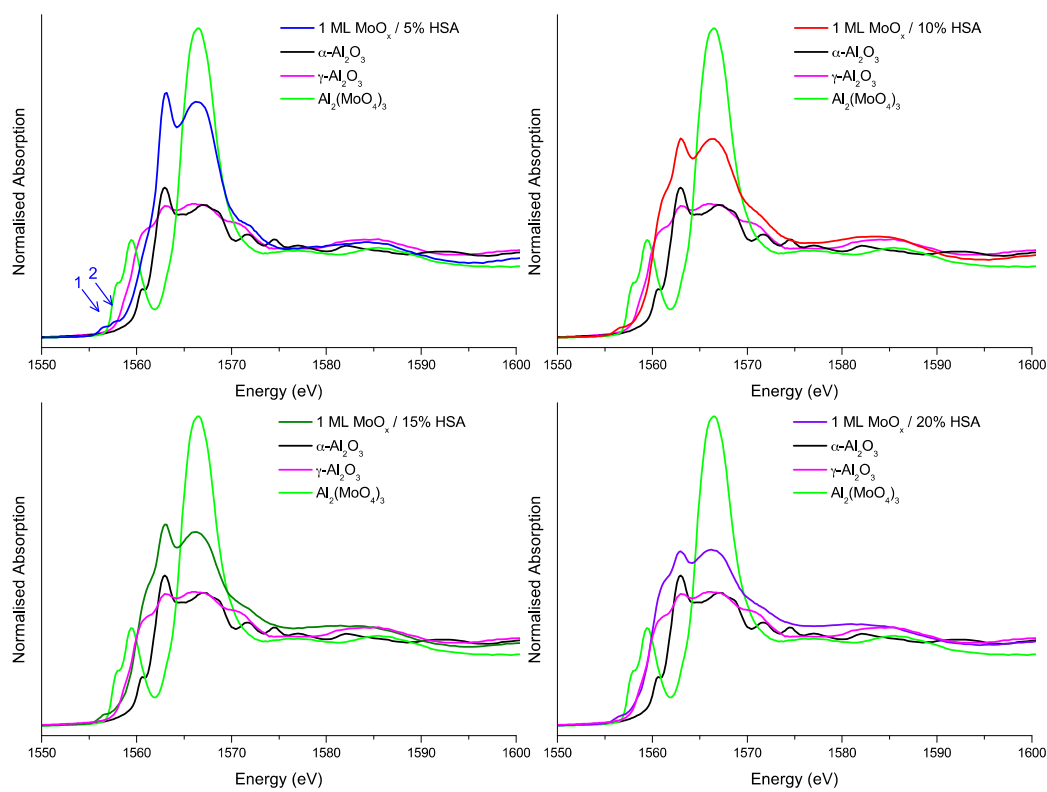

Fig S7a. A comparison of fluorescence XANES features for 1ML MoO<sub>x</sub>/HSA catalysts against reference compounds. Peaks 1 and 2 correspond with Fe3d excitations.

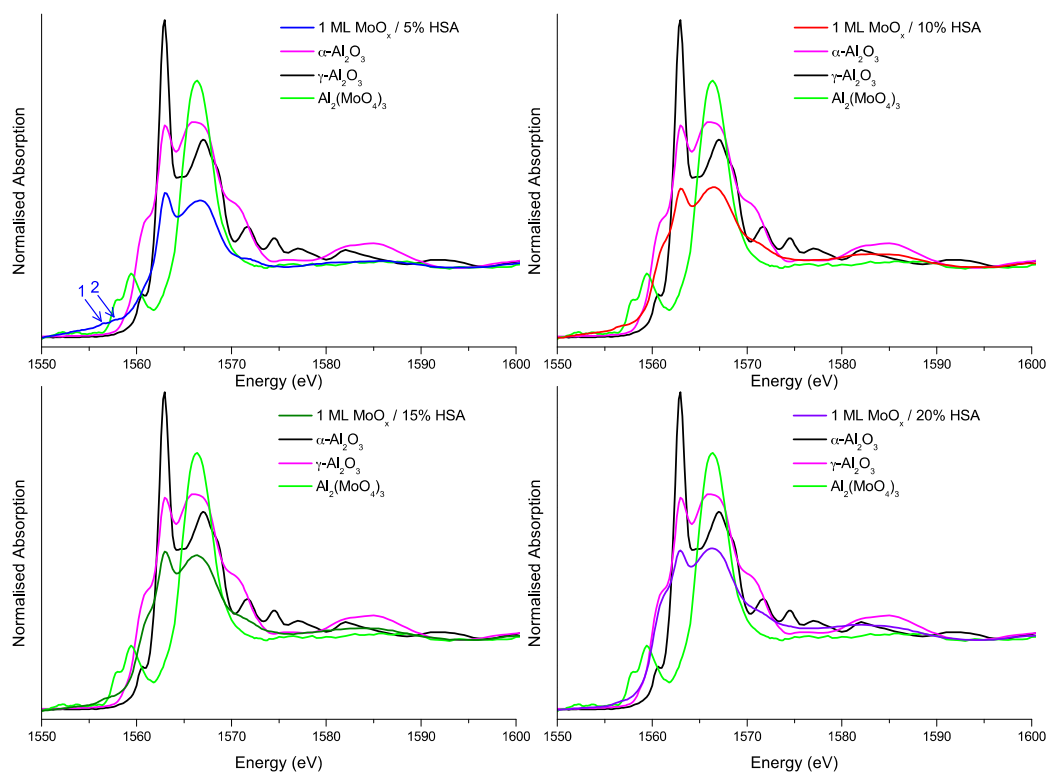

Figure S7b. A comparison of TEY XANES features for 1 ML MoO<sub>x</sub>/HSA Fe<sub>2</sub>O<sub>3</sub> catalysts against reference compounds. Peaks 1 and 2 correspond to Fe 3d excitations.

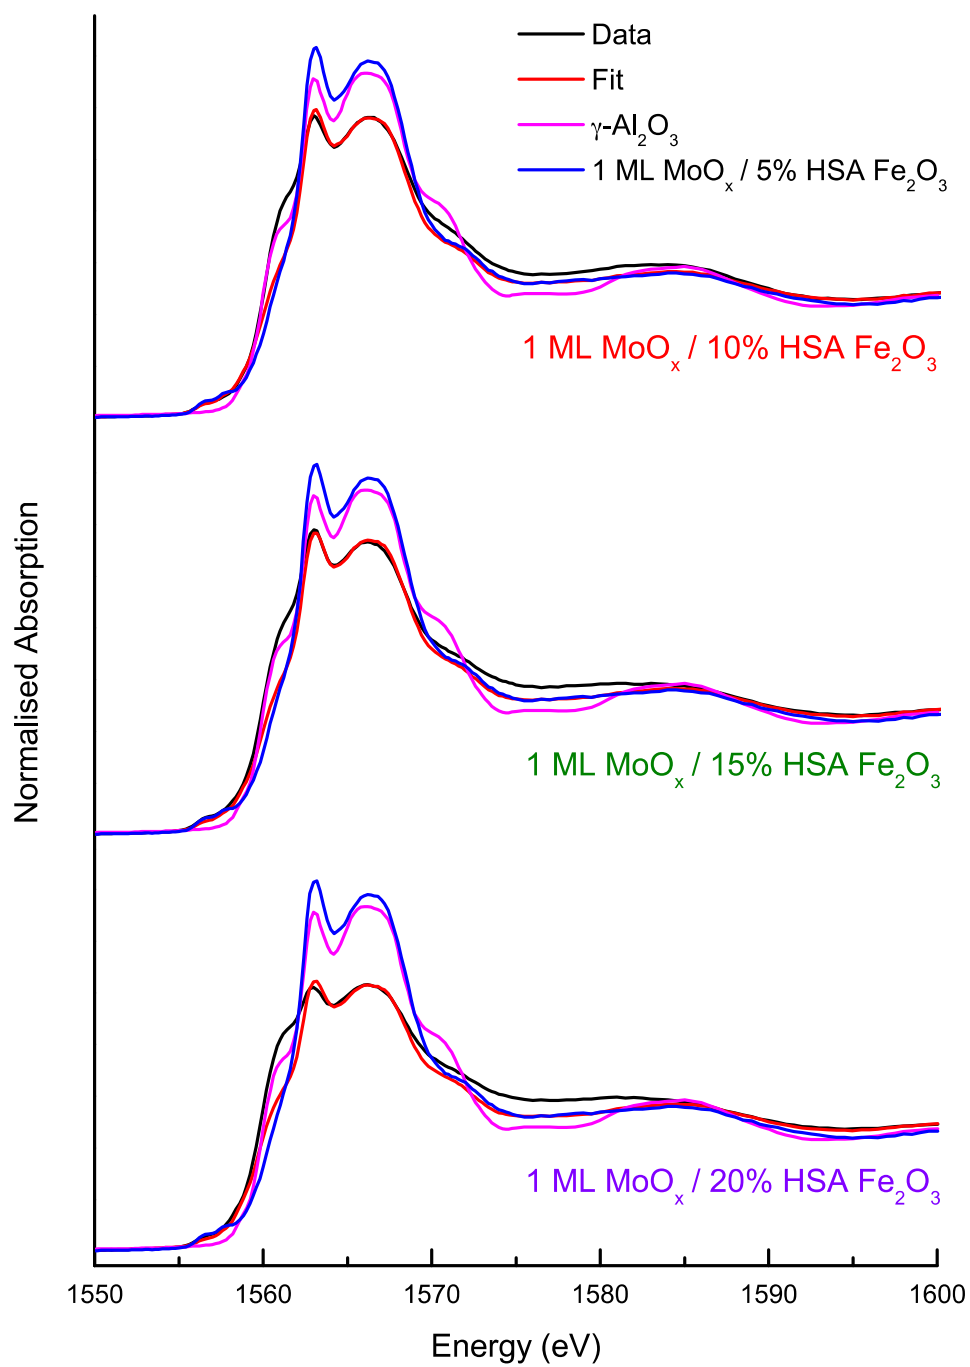

Figure S7c: A comparison of LCF results for 1 ML MoO<sub>x</sub>/10%, 15% and 20% HSA Fe<sub>2</sub>O<sub>3</sub> catalysts using  $\gamma$ -Al<sub>2</sub>O<sub>3</sub> and 1 ML MoO<sub>x</sub>/5% HSA Fe<sub>2</sub>O<sub>3</sub> as standards.

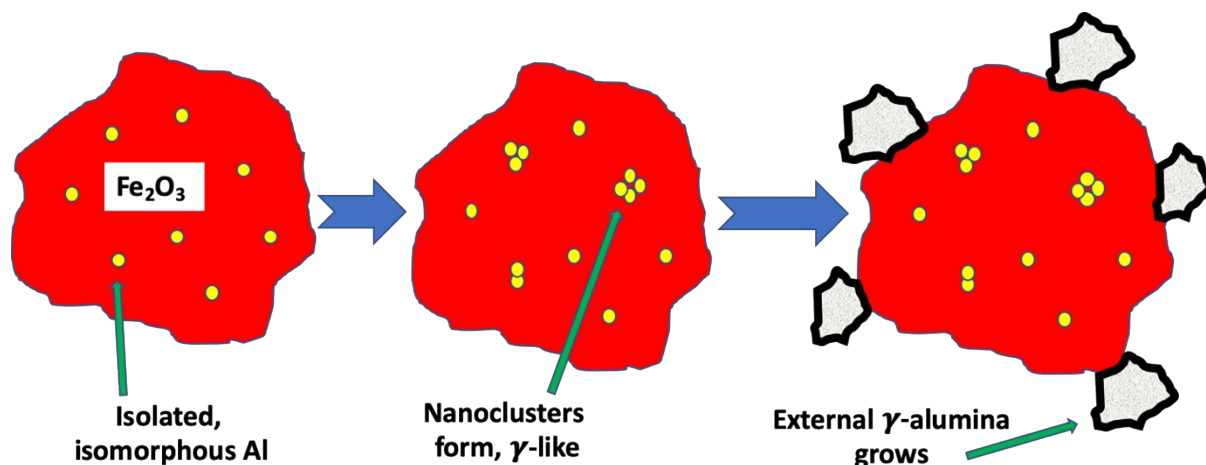

Figure S8. Showing the evolution of the structure when doping Al into haematite. First the Al is substituted in the lattice with the same corundum structure as the iron oxide. Then small nanoclusters begin to form within the haematite nanoparticles. Finally separated alumina nanocrystals begin to form.

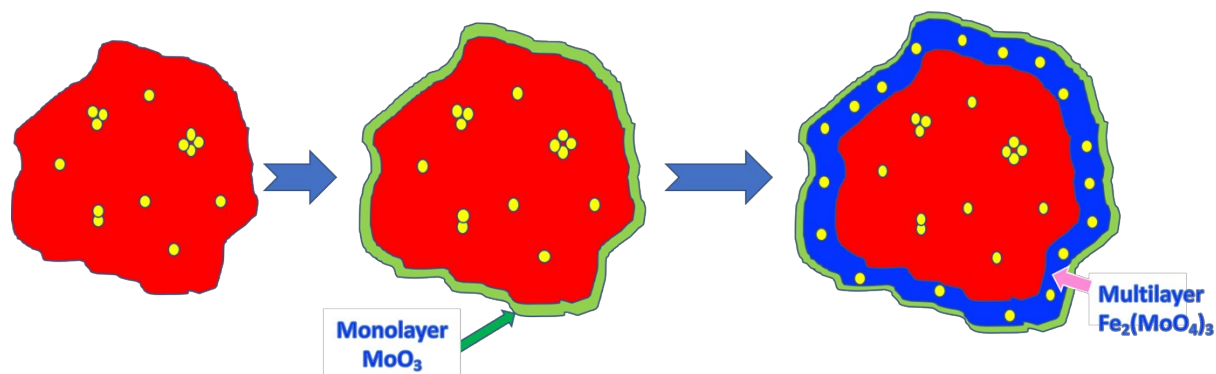

Figure S9. Showing the evolution of structure as Mo is dosed onto the surface of an intermediately Al-doped haematite. First with 1 monolayer equivalent deposited (middle panel), a single layer of  $\text{MoO}_3$ -like material covers the surface. When 3 monolayers of Mo are deposited (right panel), after annealing, the surface monolayer remains, but sublayers of iron molybdate are formed above the core of doped haematite. Al edge XAS indicates that this layer may also be doped with Al.
